# Supplementary material
Source: publisher site journal article supplement (https://www.spandidos-publications.com/3477/downloadSupplementary)

Figure S1. BCL6 mRNA level in U251 cells after transfection. U251 cells were transfected with BCL6 overexpressing plasmid (pcDNA3.1), BCL6 shRNA plasmid (pcDNA3.1) or the corresponding controls. After 48 h transfection, transfection efficiency was assessed by reverse transcription quantitative PCR. Data are presented as the mean  $\pm$  SEM. n=3. \*\*\*P<0.001 vs. Control. NC, negative control; sh, short hairpin.

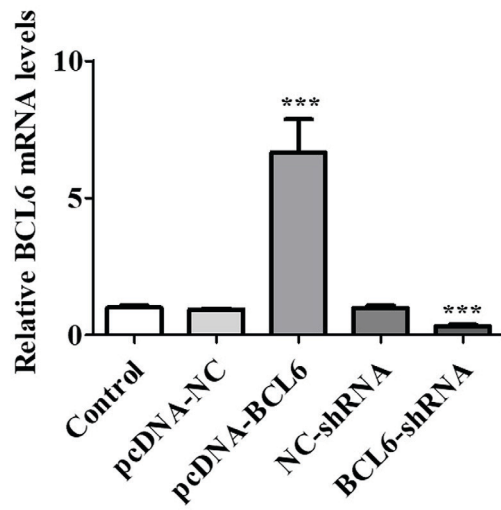

Supplement: Supplementary file 1 [file downloadSupplementary]
